# Supplementary material
Source: publisher figshare collection journal article supplement (https://acs.figshare.com/ndownloader/files/14222294)
Supplement: Supplementary file 1 [file 14222294]

## Supporting Information

### **Unified Mechanism of Oxygen Atom Transfer and Hydrogen Atom Transfer Reactions with a Triflic Acid-Bound Nonheme Manganese(IV)–Oxo Complex via Outer-Sphere Electron Transfer**

Yong-Min Lee,<sup>†</sup> Surin Kim,<sup>†</sup> Kei Ohkubo,<sup>‡</sup> Kyung-Ha Kim,<sup>†</sup> Wonwoo Nam,<sup>\*,†,¶</sup> and  
Shunichi Fukuzumi<sup>\*,†,§</sup>

<sup>†</sup> *Department of Chemistry and Nano Science, Ewha Womans University, Seoul 03760, Korea*

<sup>‡</sup> *Institute for Advanced Co-Creation Studies, Open and Transdisciplinary Research Initiatives,  
Osaka University, Suita, Osaka 565-0871, Japan*

<sup>¶</sup> *State Key Laboratory for Oxo Synthesis and Selective Oxidation, Suzhou Research Institute  
of LICP, Lanzhou Institute of Chemical Physics (LICP), Chinese Academy of Sciences,  
Lanzhou 730000, China*

<sup>§</sup> *Faculty of Science and Engineering, Meijo University, SENTAN, Japan Science and  
Technology Agency (JST), Nagoya, Aichi 468-0073, Japan*

\* E-mail: [wnnam@ewha.ac.kr](mailto:wnnam@ewha.ac.kr), [fukuzumi@chem.eng.osaka-u.ac.jp](mailto:fukuzumi@chem.eng.osaka-u.ac.jp)

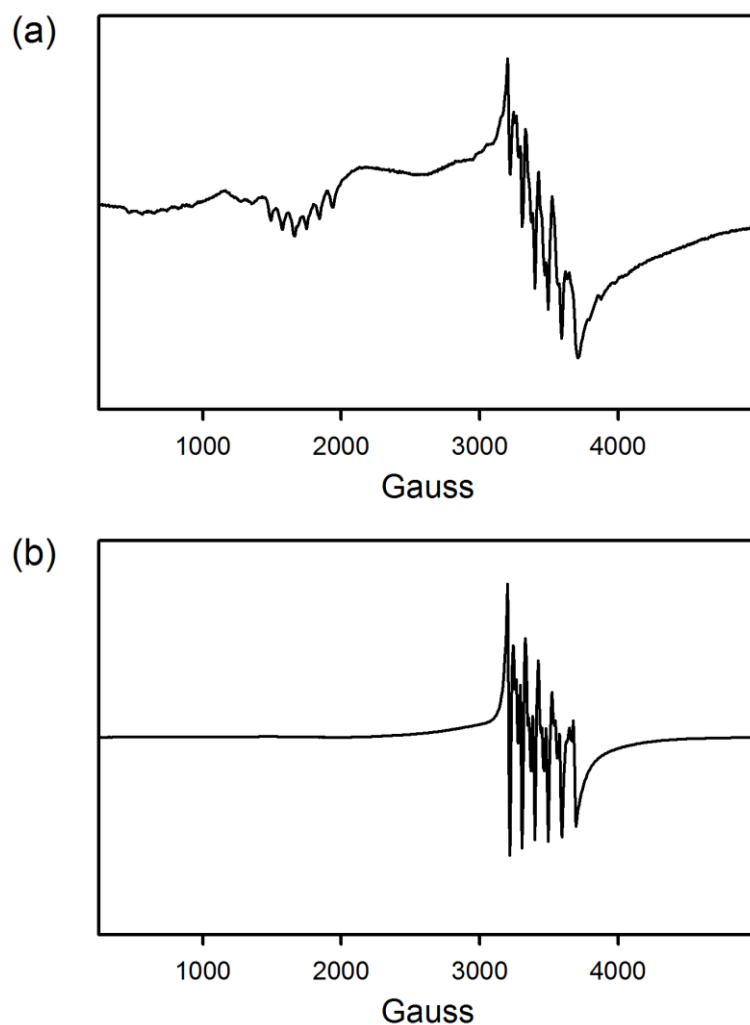

**Figure S1.** (a) X-band CW-EPR spectrum of the complete reaction solution obtained in the oxidation of *cis*-stilbene (200 mM) by **1** (0.50 mM) in TFE/MeCN (v/v = 1:1) at 273 K. It should be noted that EPR spectra obtained in the oxidation of other styrene derivatives by **1** are virtually identical to that in the oxidation of *cis*-stilbene by **1**. (b) X-band CW-EPR spectrum of the complete reaction solution obtained in the oxidation of *cis*-stilbene (20 mM) by **2** (0.50 mM) in the presence of HOTf (50 mM) in TFE/MeCN (v/v = 1:1) at 273 K. It should be noted that EPR spectra obtained in the oxidation of other styrene derivatives by **2** are virtually identical to that in the oxidation of *cis*-stilbene by **2**. All spectra were recorded at 5 K.

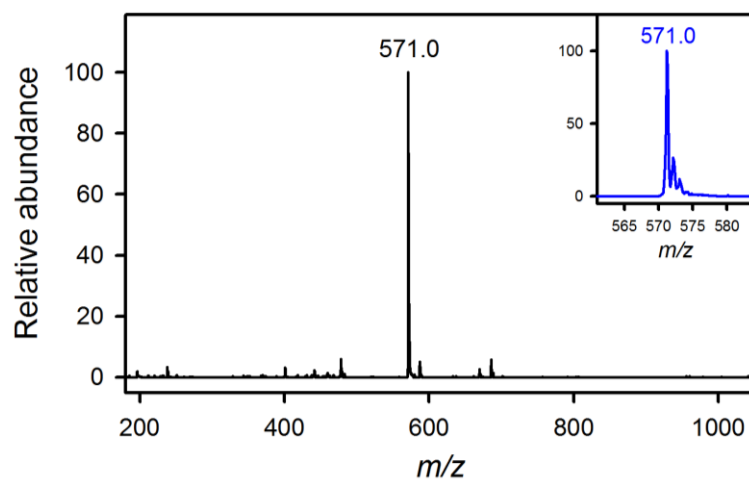

**Figure S2.** ESI-MS spectrum of the complete reaction solution obtained in the oxidation of *cis*-stilbene (200 mM) by **1** (0.50 mM) in TFE/MeCN (v/v = 1:1) at 273 K. Peak at  $m/z = 571.0$  corresponds to  $[\text{Mn}^{\text{II}}(\text{N4Py})(\text{CF}_3\text{SO}_3)]^+$  (calculated  $m/z = 571.1$ ). It should be noted that ESI-MS spectra obtained in the oxidation of *cis*-stilbene by **2** and in the oxidation of other styrene derivatives by **1** and **2** are virtually identical to that in the oxidation of *cis*-stilbene by **1**.

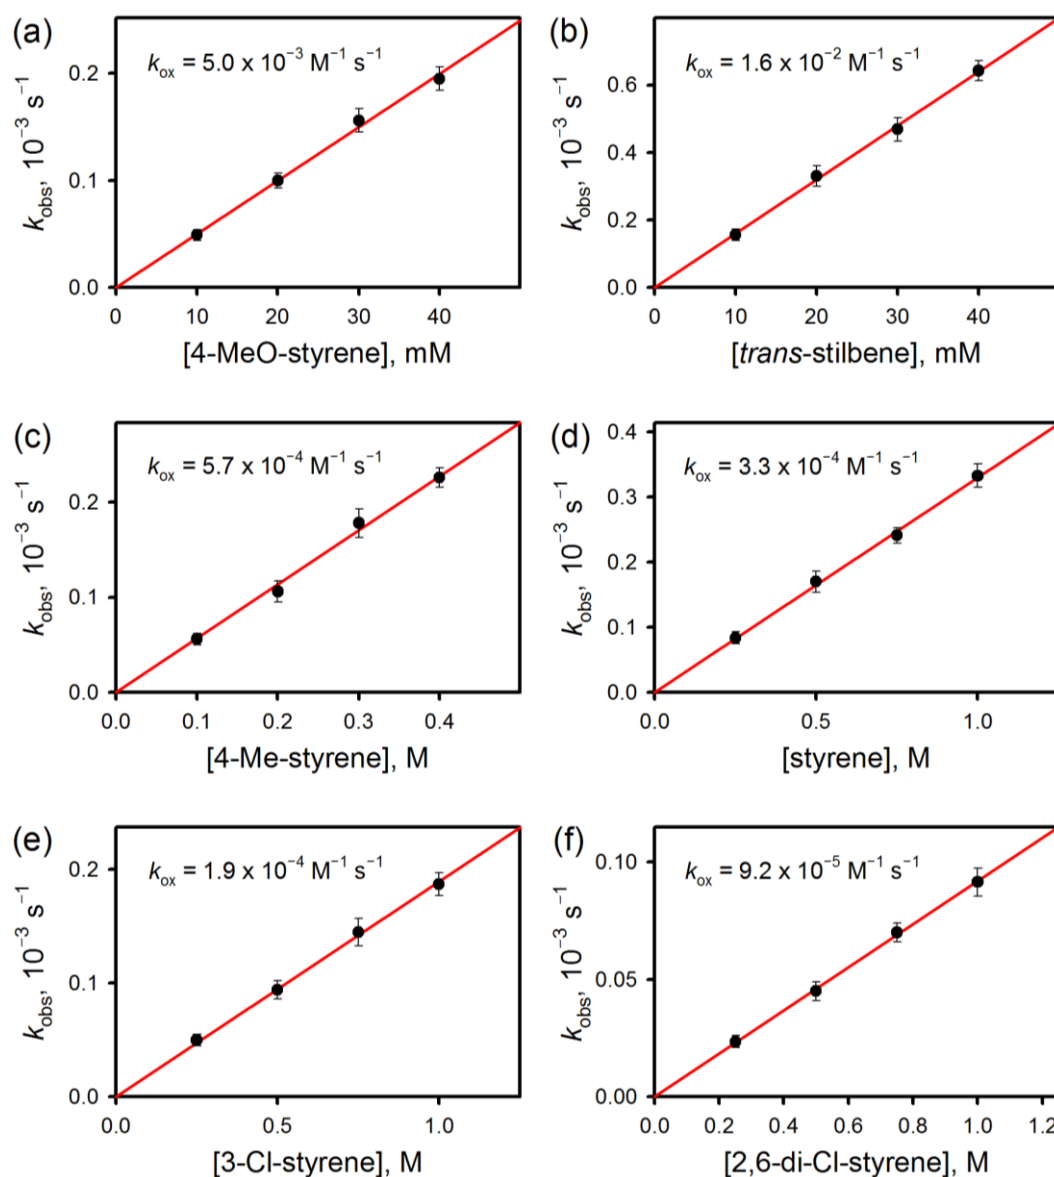

**Figure S3.** Plots of pseudo-first-order rate constants ( $k_{\text{obs}}$ ) vs concentrations of styrene derivatives to determine second-order rate constants ( $k_2$ ) of epoxidation of styrene derivatives [(a) 4-MeO-styrene, (b) *trans*-stilbene, (c) 4-Me-styrene, (d) styrene, (e) 3-Cl-styrene and (f) 2,6-di-Cl-styrene] by **1** (0.5 mM) in TFE/MeCN (v/v = 1:1) at 273 K.

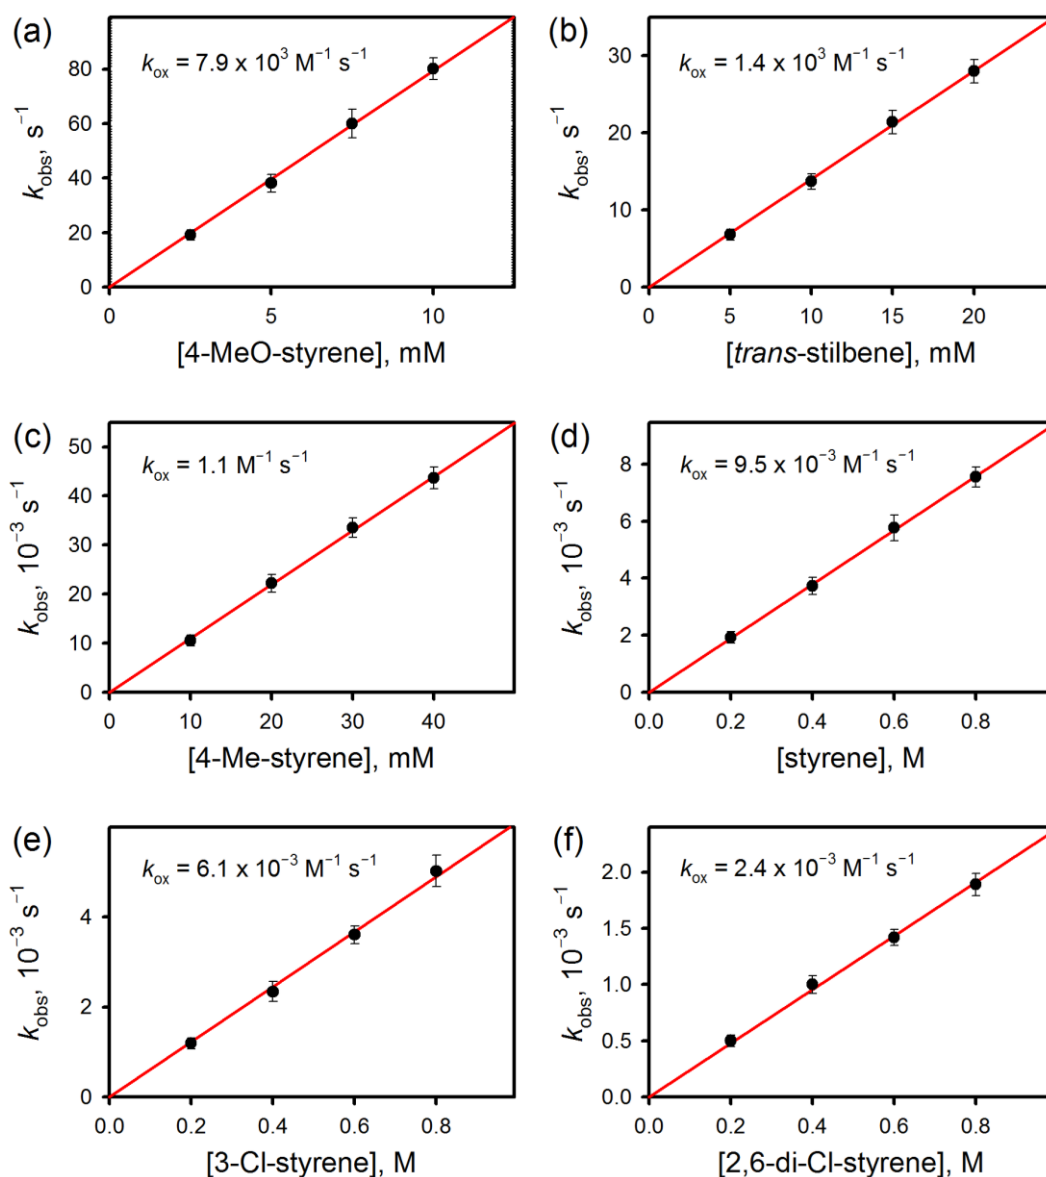

**Figure S4.** Plots of pseudo-first-order rate constants ( $k_{\text{obs}}$ ) vs concentrations of styrene derivatives to determine second-order rate constants ( $k_2$ ) of epoxidation of styrene derivatives [(a) 4-MeO-styrene, (b) *trans*-stilbene, (c) 4-Me-styrene, (d) styrene, (e) 3-Cl-styrene and (f) 2,6-di-Cl-styrene] by **2** (0.50 mM) in the presence of HOTf (50 mM) in TFE/MeCN (v/v = 1:1) at 273 K.

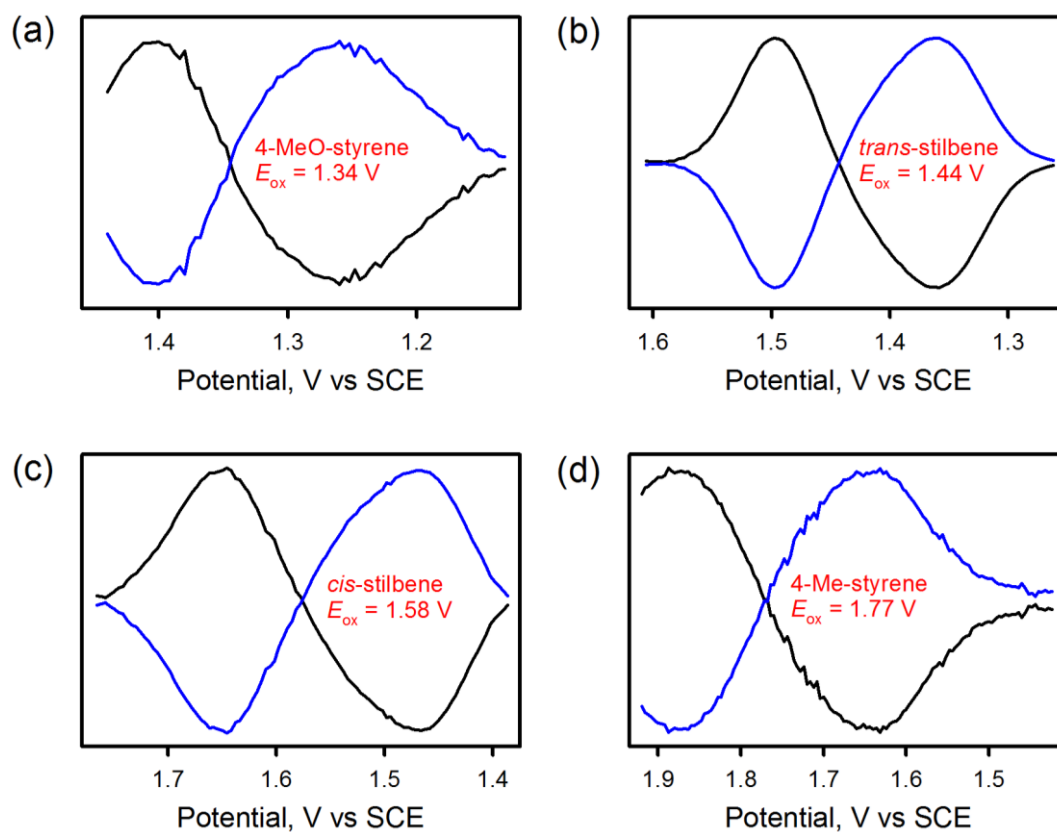

**Figure S5.** Second-harmonic alternating current voltammograms (SHACVs) of styrene derivatives (10 mM) [(a) 4-MeO-styrene, (b) *trans*-stilbene, (c) *cis*-stilbene and (d) 4-Me-styrene] in TFE/MeCN (v/v = 1:1) at 273 K. Scan rate was 4 mV/s.
